# Supplementary material
Source: publisher figshare collection journal article supplement (https://rs.figshare.com/ndownloader/files/12890930)
Supplement: Supplementary file 1 [file 12890930]

---

Peng Wang, Yan Yang, Pu Mou, Qingzhou Zhao, Yunbin Li:

Local root growth and death are mediated by contrasts in nutrient availability and root quantity between soil patches

Journal name: Proceedings of the Royal Society B

Article DOI: 10.1098/rspb

**Supplementary material**

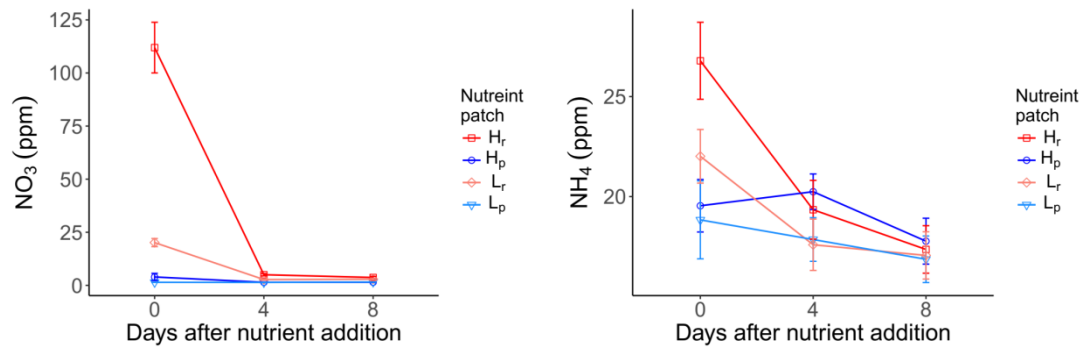

**Fig. S1** Changes in nitrate and ammonium concentrations of different patches right after nutrient addition and 4, 8 days after nutrient addition. Error bars represent  $\pm$  SE.

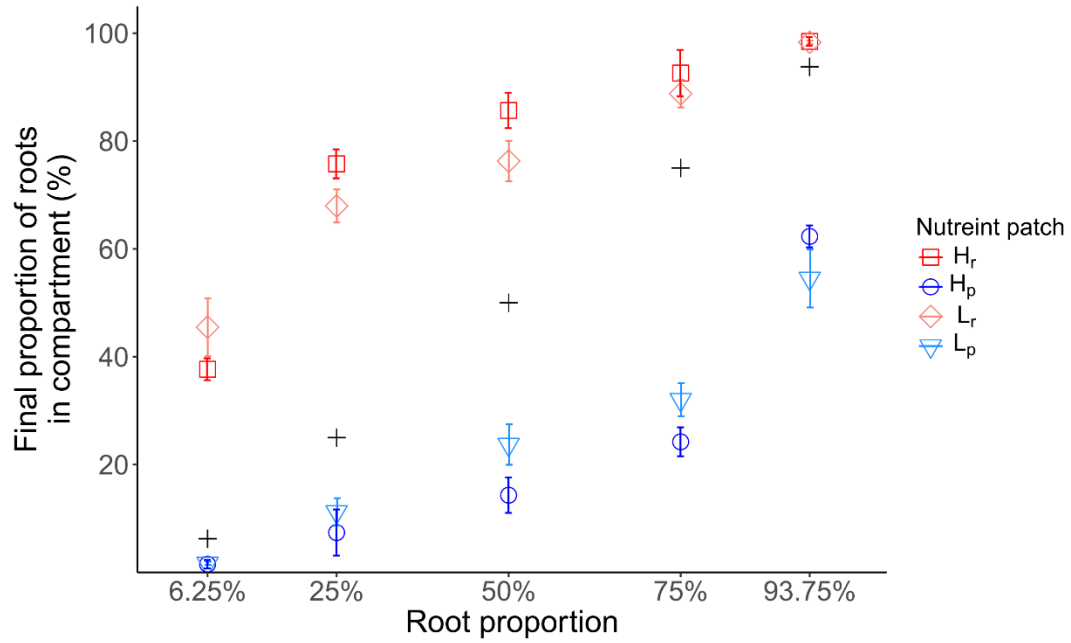

**Fig. S2** The proportion of roots in each compartment relative to total root biomass in the container at the end of the experiment. Red squares denote plants in high-contrast nutrient-rich patches; blue circles denote plants in high-contrast nutrient-poor patches; light red rhombuses denote plants low-contrast nutrient-rich patches; light blue inverted triangles denote plants in low-contrast nutrient-poor patches. Plus signs denote initial root proportions at the beginning of the experiment. Error bars represent  $\pm$  SE.

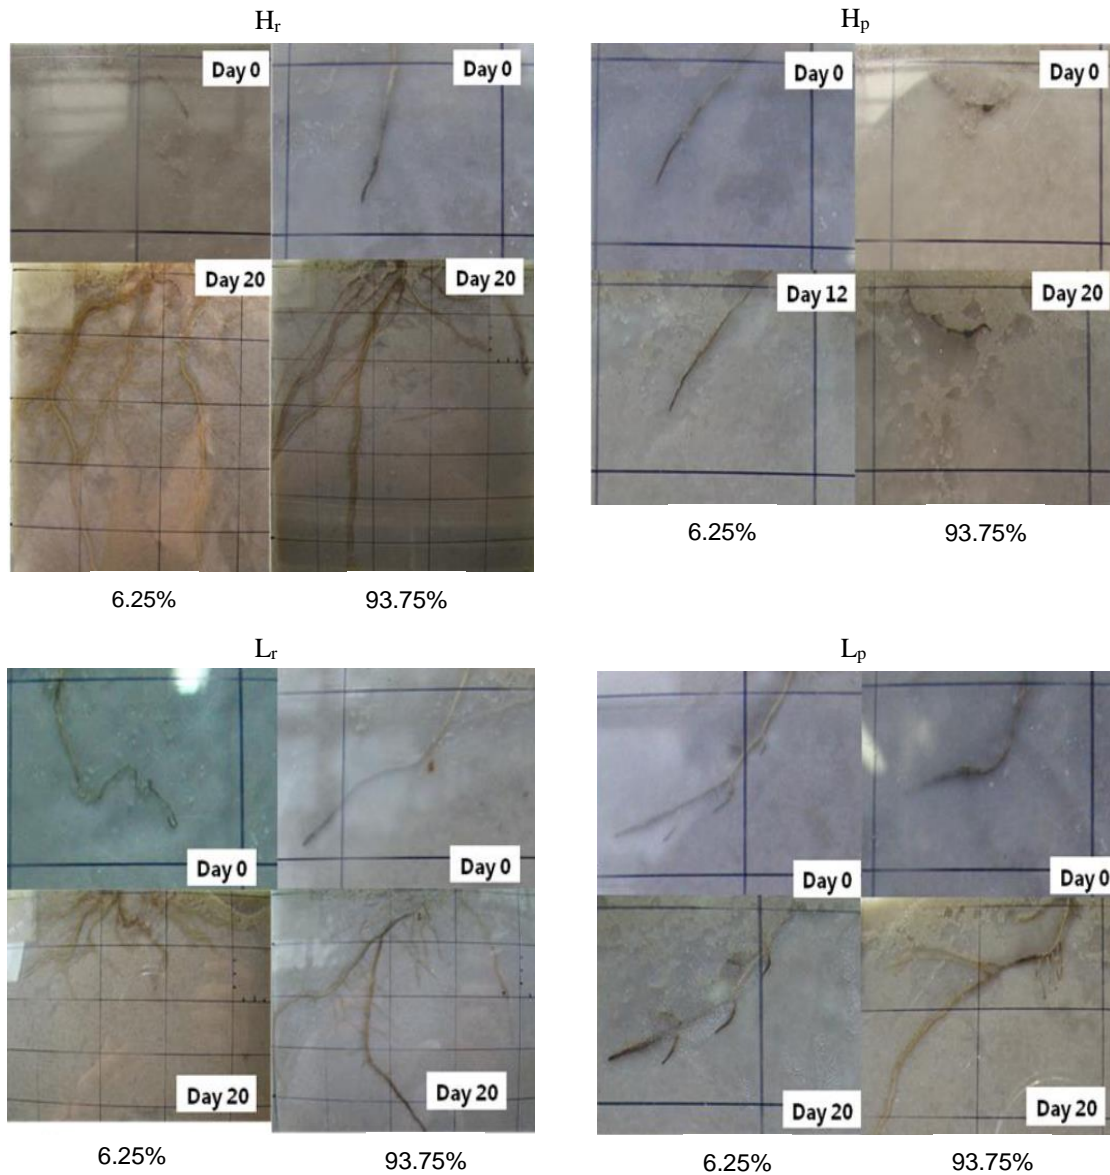

**Fig. S3** Pictures showing the variation in root proliferation observed in different treatments. nutrient-rich patch,  $H_r$ , nutrient-rich patch with high nutrient contrast;  $H_p$ , nutrient-poor patch with high nutrient contrast;  $L_r$ , nutrient-rich patch with low nutrient contrast;  $L_p$ , nutrient-poor patch with low nutrient contrast. Number below each pair of pictures denote the initial proportion of roots in the patch.
